# Supplementary material for: The Impact of Message Content and Format on Initial Parental Engagement in a Parenting Intervention: An Experimental Study
Source: Springer Nature journal article supplement (doi:10.1007/s10608-022-10305-0), 2022-05-14
Supplement: MOESM1 [file 20401876]

## Conflict-of-Interest Disclosure Form

### *Cognitive Therapy and Research*

When an author or the institution of the author has a relationship, financial or otherwise, with individuals or organizations that could influence the author's work inappropriately, a conflict of interest may exist. Examples of potential conflicts of interest may include but are not limited to academic, personal, or political relationships; employment; consultancies or honoraria; and financial connections, such as stock ownership and funding. Although an author may not feel that there are conflicts, disclosure of relationships and interests that could be viewed by others as conflicts of interest affords a more transparent and prudent process.

All authors and co-authors (if any) of papers submitted to *Cognitive Therapy and Research* must complete this form and disclose any actual or potential conflict of interest. The journal may publish such disclosures.

Please complete and return this form (one per author) and submit it/them **together with your manuscript** to the journal's Editorial Manager submission website.

I have included a section, Conflict-of-Interest Statement, in the manuscript (applies even if there are no disclosures).

I have no potential conflict of interest pertaining to this submission to *Cognitive Therapy and Research*.

| Category for Disclosure | Description of Interest/Arrangement                                                                                                                                                                                                                                                                                                                                                                                                                                                                                                                                                                                                                                                                                                                                                                                                                                                                               |
|-------------------------|-------------------------------------------------------------------------------------------------------------------------------------------------------------------------------------------------------------------------------------------------------------------------------------------------------------------------------------------------------------------------------------------------------------------------------------------------------------------------------------------------------------------------------------------------------------------------------------------------------------------------------------------------------------------------------------------------------------------------------------------------------------------------------------------------------------------------------------------------------------------------------------------------------------------|
| Royalties               | The Parenting and Family Support Centre is partly funded by royalties stemming from published resources of the Triple P – Positive Parenting Program, which is developed and owned by The University of Queensland (UQ). Royalties are also distributed to the Faculty of Health and Behavioural Sciences at UQ and contributory authors of published Triple P resources. Triple P International (TPI) Pty Ltd is a private company licensed by Uniquest Pty Ltd on behalf of UQ, to publish and disseminate Triple P worldwide. The authors of this report have no share or ownership of TPI. Alina Morawska and Divna M. Haslam receive royalties from TPI. TPI had no involvement in the study design, collection, analysis or interpretation of data, or writing of this report. Alina Morawska is an employee at UQ. Carolina Gonzalez is a student at UQ. Divna M. Haslam holds an honorary position at UQ. |

Article Title The Impact of Message Content and Format on Initial Parental Engagement in a Parenting Intervention: An Experimental Study

All Authors Carolina Gonzalez, Alina Morawska, Divna M. Haslam

Author Name Carolina Gonzalez

Author Signature  Date 14/01/2021

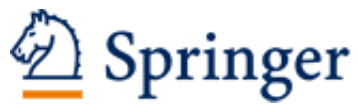

<http://www.springer.com/journal/10608>

Cognitive Therapy and Research

Editor-in-Chief: Hofmann, S.G.

ISSN: 0147-5916 (print version)

ISSN: 1573-2819 (electronic version)

Journal no. 10608

## Conflict-of-Interest Disclosure Form

### *Cognitive Therapy and Research*

When an author or the institution of the author has a relationship, financial or otherwise, with individuals or organizations that could influence the author's work inappropriately, a conflict of interest may exist. Examples of potential conflicts of interest may include but are not limited to academic, personal, or political relationships; employment; consultancies or honoraria; and financial connections, such as stock ownership and funding. Although an author may not feel that there are conflicts, disclosure of relationships and interests that could be viewed by others as conflicts of interest affords a more transparent and prudent process.

All authors and co-authors (if any) of papers submitted to *Cognitive Therapy and Research* must complete this form and disclose any actual or potential conflict of interest. The journal may publish such disclosures.

Please complete and return this form (one per author) and submit it/them **together with your manuscript** to the journal's Editorial Manager submission website.

I have included a section, Conflict-of-Interest Statement, in the manuscript (applies even if there are no disclosures).

I have no potential conflict of interest pertaining to this submission to *Cognitive Therapy and Research*.

| Category for Disclosure | Description of Interest/Arrangement                                                                                                                                                                                                                                                                                                                                                                                                                                                                                                                                                                                                                                                                                                                                                                                                                                                                               |
|-------------------------|-------------------------------------------------------------------------------------------------------------------------------------------------------------------------------------------------------------------------------------------------------------------------------------------------------------------------------------------------------------------------------------------------------------------------------------------------------------------------------------------------------------------------------------------------------------------------------------------------------------------------------------------------------------------------------------------------------------------------------------------------------------------------------------------------------------------------------------------------------------------------------------------------------------------|
| Royalties               | The Parenting and Family Support Centre is partly funded by royalties stemming from published resources of the Triple P – Positive Parenting Program, which is developed and owned by The University of Queensland (UQ). Royalties are also distributed to the Faculty of Health and Behavioural Sciences at UQ and contributory authors of published Triple P resources. Triple P International (TPI) Pty Ltd is a private company licensed by Uniquest Pty Ltd on behalf of UQ, to publish and disseminate Triple P worldwide. The authors of this report have no share or ownership of TPI. Alina Morawska and Divna M. Haslam receive royalties from TPI. TPI had no involvement in the study design, collection, analysis or interpretation of data, or writing of this report. Alina Morawska is an employee at UQ. Carolina Gonzalez is a student at UQ. Divna M. Haslam holds an honorary position at UQ. |

Article Title The Impact of Message Content and Format on Initial Parental Engagement in a Parenting Intervention: An Experimental Study

All Authors Carolina Gonzalez, Alina Morawska, Divna M. Haslam

Author Name Alina Morawska

Author Signature  Date 14/1/2021



<http://www.springer.com/journal/10608>

Cognitive Therapy and Research

Editor-in-Chief: Hofmann, S.G.

ISSN: 0147-5916 (print version)

ISSN: 1573-2819 (electronic version)

Journal no. 10608

## Conflict-of-Interest Disclosure Form

### *Cognitive Therapy and Research*

When an author or the institution of the author has a relationship, financial or otherwise, with individuals or organizations that could influence the author's work inappropriately, a conflict of interest may exist. Examples of potential conflicts of interest may include but are not limited to academic, personal, or political relationships; employment; consultancies or honoraria; and financial connections, such as stock ownership and funding. Although an author may not feel that there are conflicts, disclosure of relationships and interests that could be viewed by others as conflicts of interest affords a more transparent and prudent process.

All authors and co-authors (if any) of papers submitted to *Cognitive Therapy and Research* must complete this form and disclose any actual or potential conflict of interest. The journal may publish such disclosures.

Please complete and return this form (one per author) and submit it/them **together with your manuscript** to the journal's Editorial Manager submission website.

I have included a section, Conflict-of-Interest Statement, in the manuscript (applies even if there are no disclosures).

I have no potential conflict of interest pertaining to this submission to *Cognitive Therapy and Research*.

| Category for Disclosure | Description of Interest/Arrangement                                                                                                                                                                                                                                                                                                                                                                                                                                                                                                                                                                                                                                                      |
|-------------------------|------------------------------------------------------------------------------------------------------------------------------------------------------------------------------------------------------------------------------------------------------------------------------------------------------------------------------------------------------------------------------------------------------------------------------------------------------------------------------------------------------------------------------------------------------------------------------------------------------------------------------------------------------------------------------------------|
| Royalties               | The Parenting and Family Support Centre is partly funded by royalties stemming from published resources of the Triple P – Positive Parenting Program, which is developed and owned by The University of Queensland (UQ).                                                                                                                                                                                                                                                                                                                                                                                                                                                                 |
|                         | Royalties are also distributed to the Faculty of Health and Behavioural Sciences at UQ and contributory authors of published Triple P resources. Triple P International (TPI) Pty Ltd is a private company licensed by Uniquest Pty Ltd on behalf of UQ, to publish and disseminate Triple P worldwide. The authors of this report have no share or ownership of TPI. Alina Morawska and Divna M. Haslam receive royalties from TPI. TPI had no involvement in the study design, collection, analysis or interpretation of data, or writing of this report. Alina Morawska is an employee at UQ. Carolina Gonzalez is a student at UQ. Divna M. Haslam holds an honorary position at UQ. |

Article Title The Impact of Message Content and Format on Initial Parental Engagement in a Parenting Intervention: An Experimental Study

All Authors Carolina Gonzalez, Alina Morawska, Divna M. Haslam

Author Name Divna Haslam

Author Signature  Date 14/1/21



<http://www.springer.com/journal/10608>

Cognitive Therapy and Research

Editor-in-Chief: Hofmann, S.G.

ISSN: 0147-5916 (print version)

ISSN: 1573-2819 (electronic version)

Journal no. 10608
